# Supplementary material
Source: Springer Nature journal article supplement (https://www.springermedizin.de/resource/supplementary/12967_2014_1768_MOESM5_ESM.pdf/9575316)

Before CPB

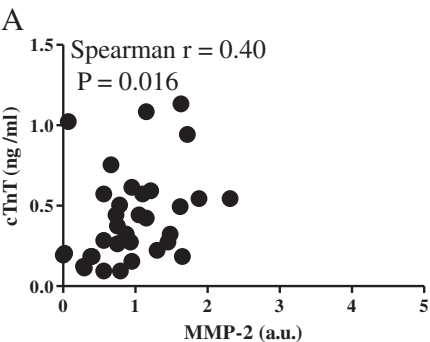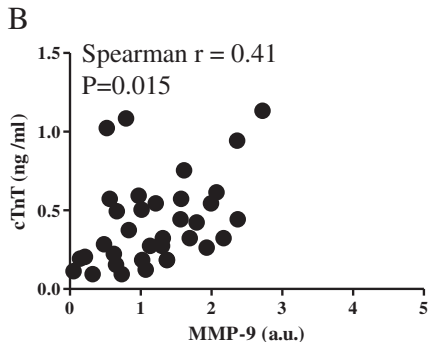

After CPB

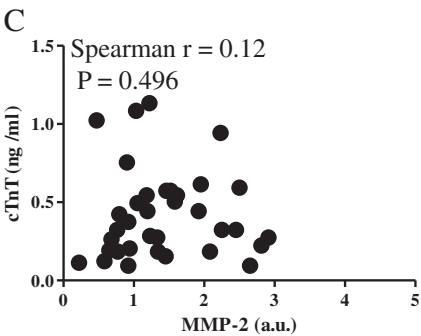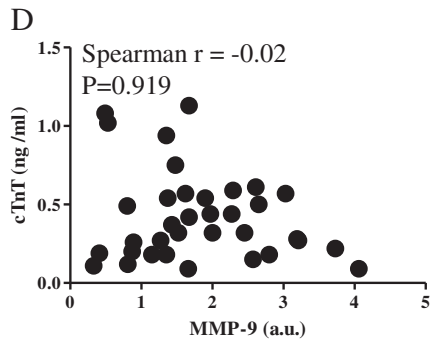

Supplement: MOESM5 [file 9575316]
